# Supplementary material for: Aggregation-induced emission (AIE)-active fluorescent probes with multiple binding sites toward ATP sensing and live cell imaging
Source: Royal Society of Chemistry journal article supplement (doi:10.1039/c7tb02399e), 2017-01-01
Supplement: c7tb02399e2.pdf [file c7tb02399e2.pdf]

## Supplementary Information

### **Aggregation-induced emission (AIE)-Active Fluorescent Probes with Multisite-Binding Sites toward ATP Sensing and the Live Cell Imaging**

*Hengchang Ma,<sup>‡</sup> Manyi Yang, Caili Zhang,<sup>§</sup> Yucheng Ma, Yanfang Qin, Ziqiang Lei,<sup>‡</sup> Lu Chang,  
Lei Lei, Tao Wang, Yuan Yang*

*Key Laboratory of Polymer Materials of Gansu Province, Key Laboratory of Eco-  
Environment-Related Polymer Materials Ministry of Education, College of Chemistry and  
Chemical Engineering, Northwest Normal University, Lanzhou 730070, PR China*

<sup>‡</sup>E-mail: mahczju@hotmail.com; Leizq@nwnu.edu.cn.

## Table of Contents

|                                                                               |    |
|-------------------------------------------------------------------------------|----|
| Synthesis of TPA-PP, TPA-PPA-1, TPA-PPA-2, TPA-PPA-3.....                     | 2  |
| <b>Scheme S1.</b> Synthesis of TPA-PP and TPA-PPA-1                           |    |
| <b>Scheme S2.</b> Synthesis of TPA-PPA-2                                      |    |
| <b>Scheme S3.</b> Synthesis of TPA-PPA-3                                      |    |
| <b>Figure S1.</b> The NMR data spectra of TPA-PP.....                         | 4  |
| <b>Figure S2.</b> The NMR data spectra of TPA-PPA-1.....                      | 5  |
| <b>Figure S3.</b> The NMR data spectra of TPA-PPA-2.....                      | 6  |
| <b>Figure S4.</b> The NMR data spectra of TPA-PPA-3.....                      | 7  |
| <b>Figure S5.</b> Absorption spectra studies.....                             | 8  |
| <b>Figure S6.</b> Fluorescence spectra studies.....                           | 10 |
| <b>Table S1.</b> Fluorescence quantum yield.....                              | 12 |
| <b>Figure S7.</b> Particle size distributions upon the addition of ATP.....   | 12 |
| <b>Figure S8.</b> Tyndall effect of TPA-PPA-3.....                            | 12 |
| <b>Figure S9.</b> Absorption spectra studies upon the addition of ATP.....    | 13 |
| <b>Figure S10.</b> Fluorescence spectra studies upon the addition of ATP..... | 15 |
| <b>Figure S11.</b> Detection limit upon the addition of ATP.....              | 17 |
| <b>Figure S12.</b> Cell viabilities of HepG-2 cells.....                      | 18 |

## Synthesis of TPA-PP and TPA-PPA-1

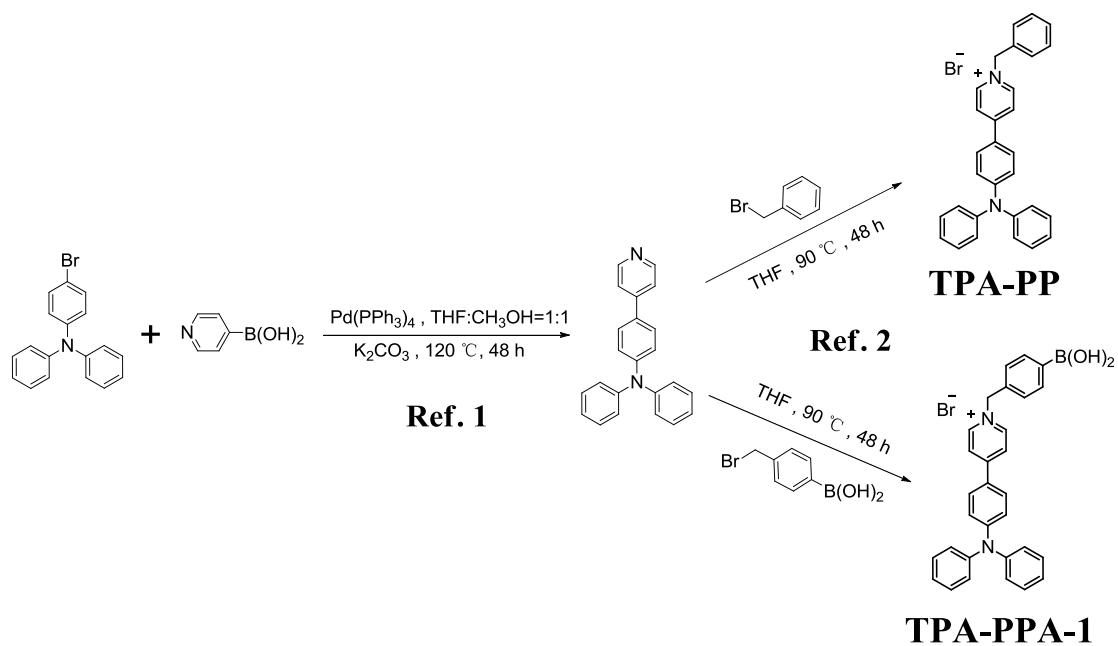

**Scheme S1** The synthesis of TPA-PP and TPA-PPA-1

## Synthesis of TPA-PPA-2

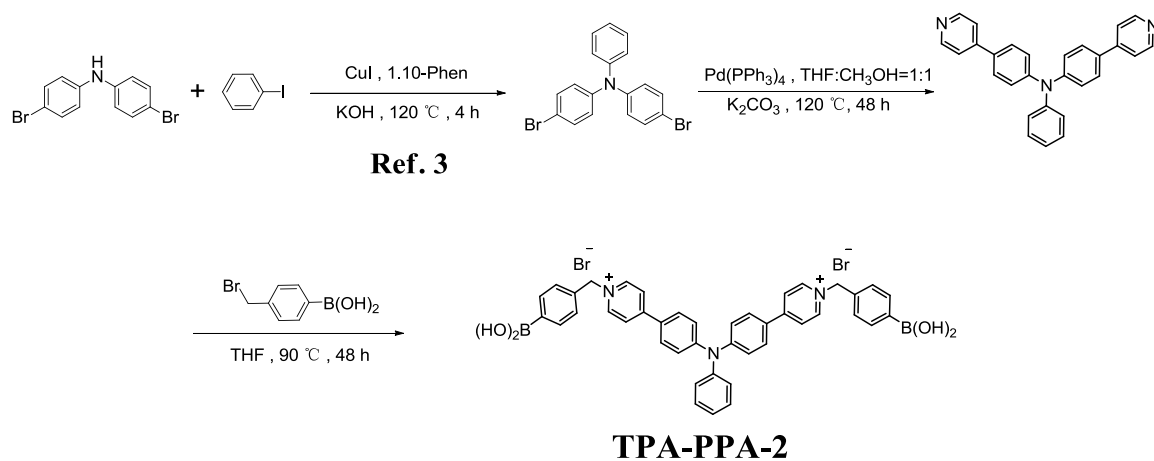

**Scheme S2** The synthesis of TPA-PPA-2

## Synthesis of TPA-PPA-3

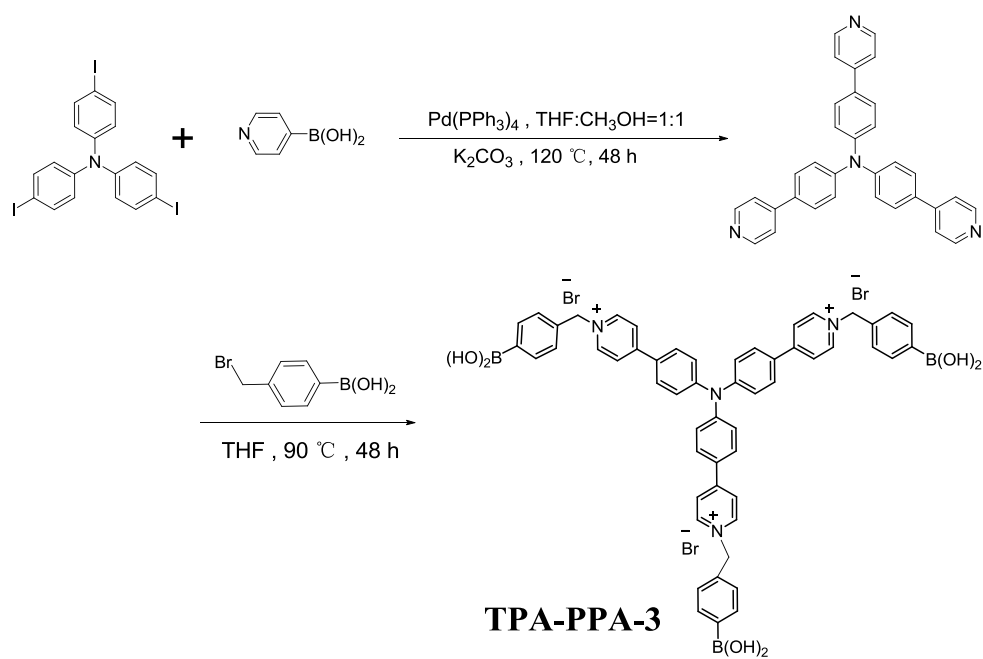

**Scheme S3** The synthesis of TPA-PPA-3

## TPA-PP

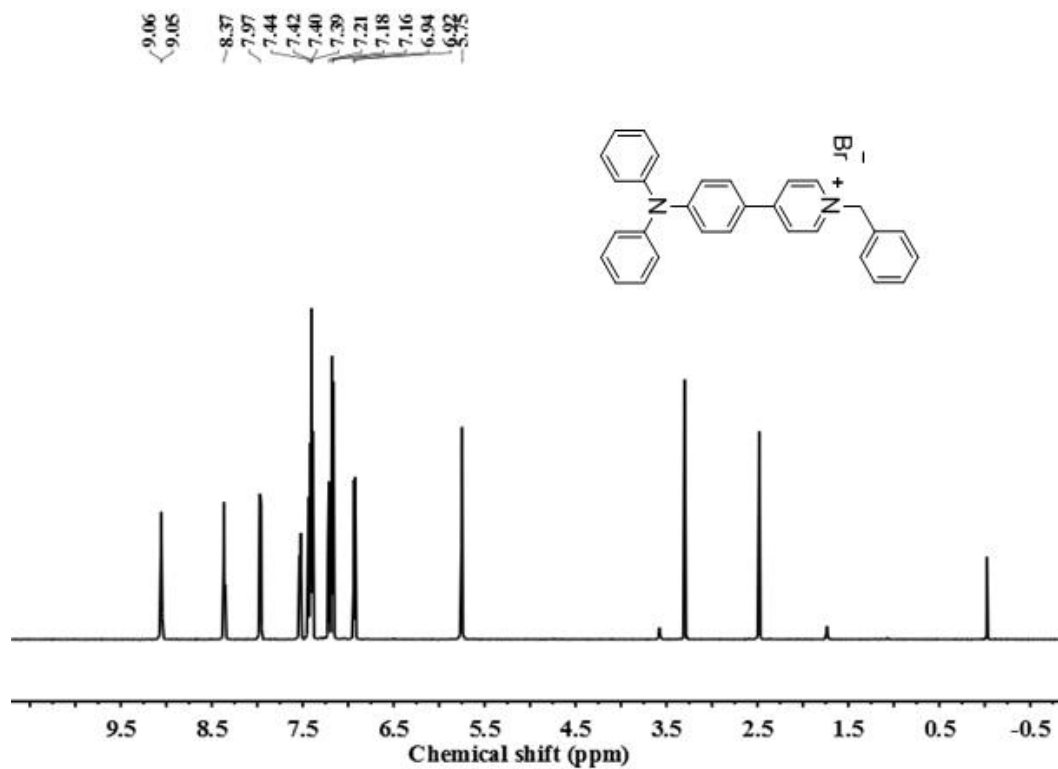

**Figure S1 (a)** <sup>1</sup>H NMR spectra of TPA-PP

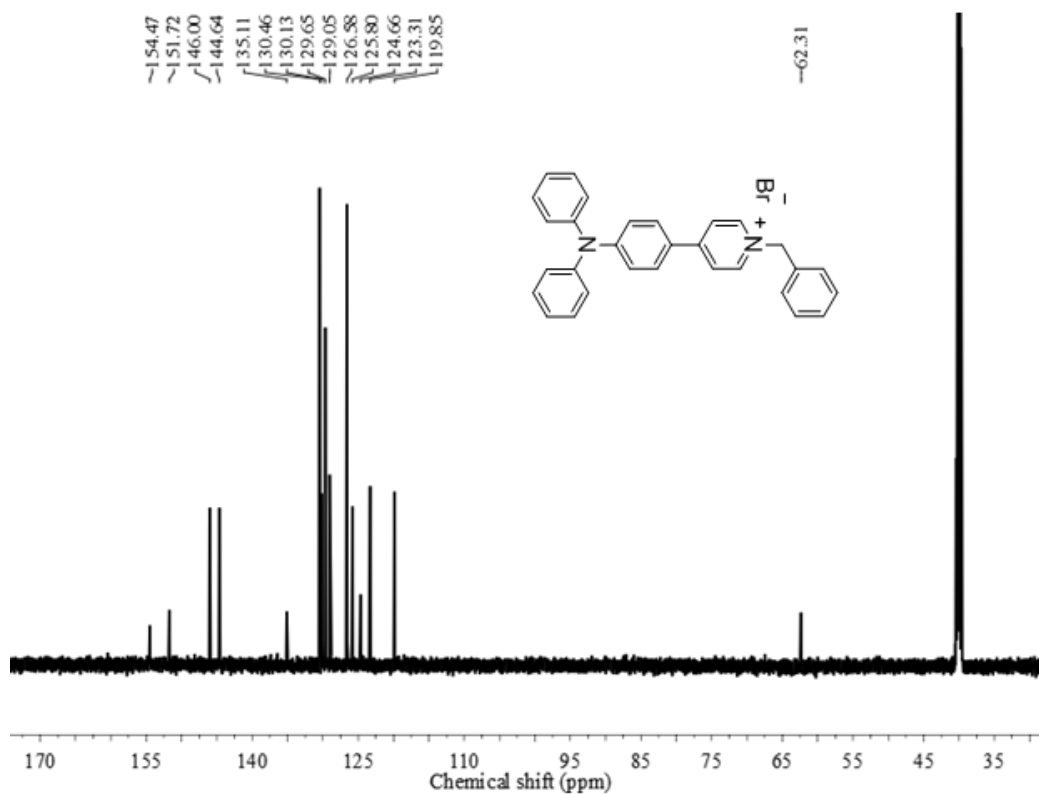

**Figure S1 (b)** <sup>13</sup>C NMR spectra of TPA-PP

## TPA-PPA-1

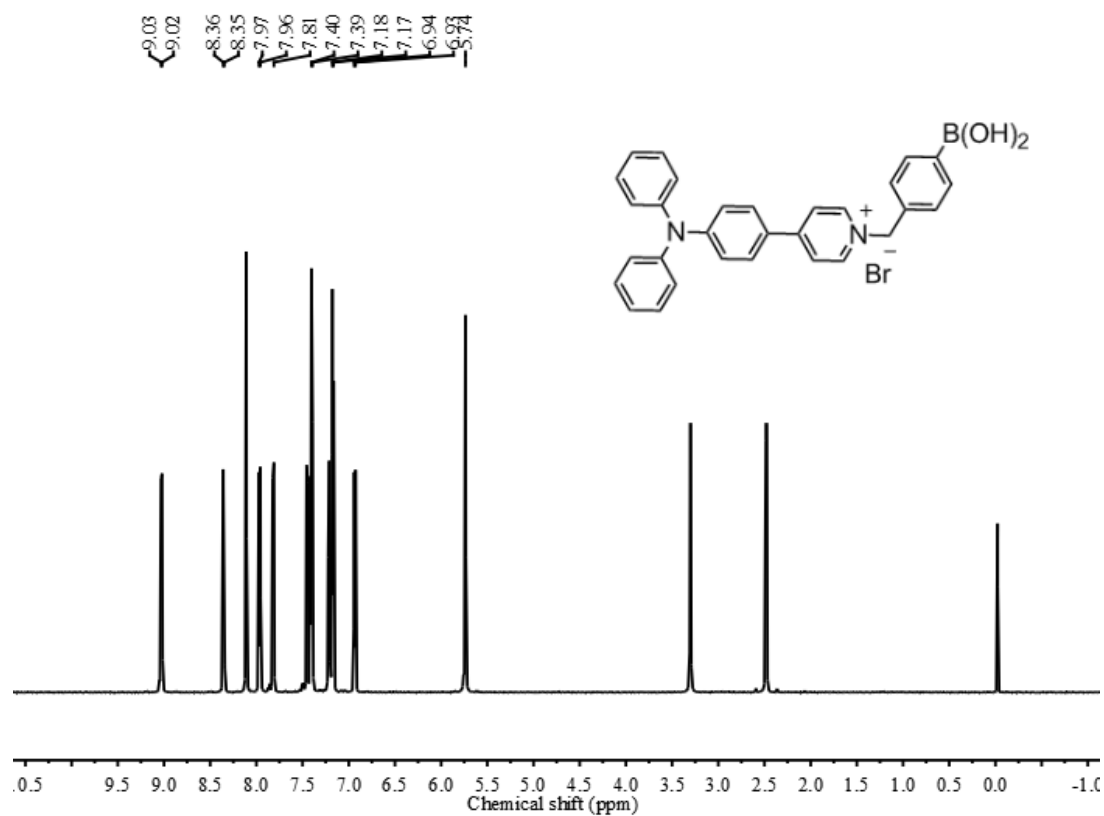

Figure S2 (a) <sup>1</sup>H NMR spectra of TPA-PPA-1

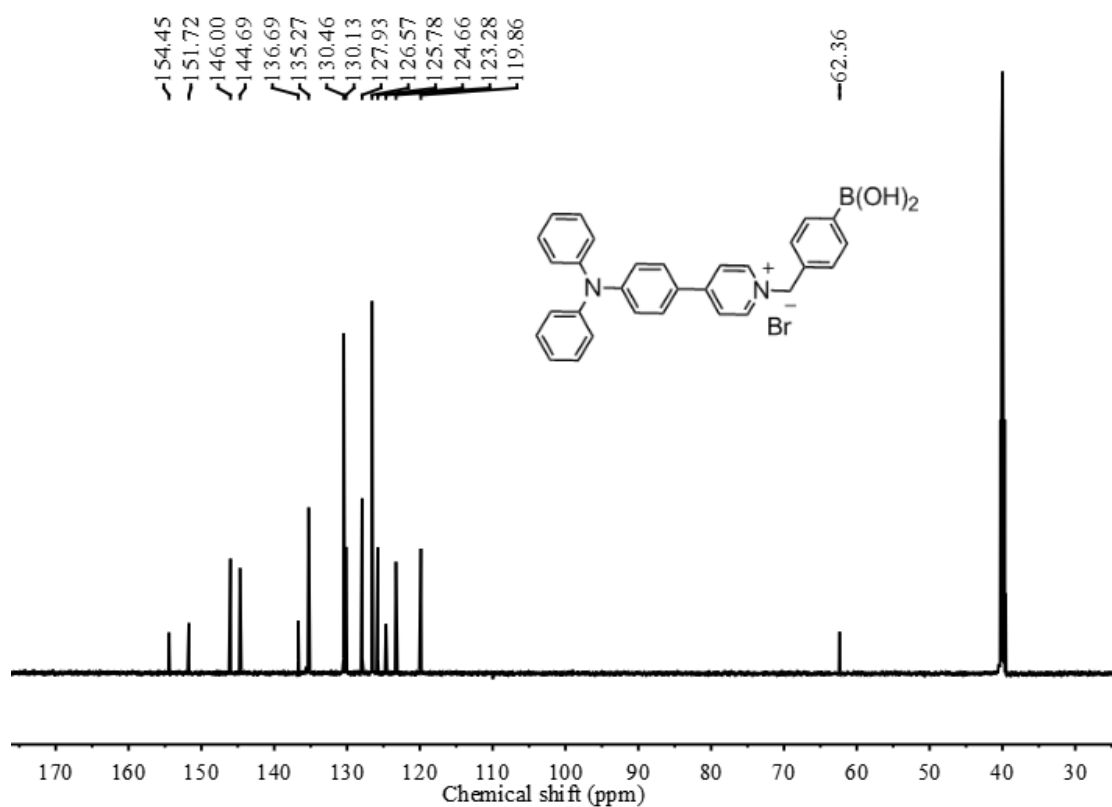

Figure S2 (b) <sup>13</sup>C NMR spectra of TPA-PPA-1

Chemical structure of compound 10 is shown above the spectrum. The structure is a bis-phenol boronate ester derivative with a central diphenylamine core and two 4-(4-bromophenyl)pyridin-2-yl groups.

Chemical shift (ppm): 9.17, 9.16, 8.49, 8.47, 8.16, 8.11, 8.09, 7.86, 7.84, 7.52, 7.50, 7.45, 7.33, 7.25, 7.21, 5.83.

Chemical structure of compound 10 is shown above the spectrum. The structure is a bis-phenol boronate ester derivative with a central diphenylamine core and two 4-(hydroxyboronyl)phenyl groups.

Chemical shift (ppm): 154.36, 150.24, 144.96, 136.61, 135.27, 130.80, 130.33, 128.97, 127.97, 127.94, 127.36, 124.11, 123.48, 121.56, 116.31, 62.59.

6

## TPA-PPA-3

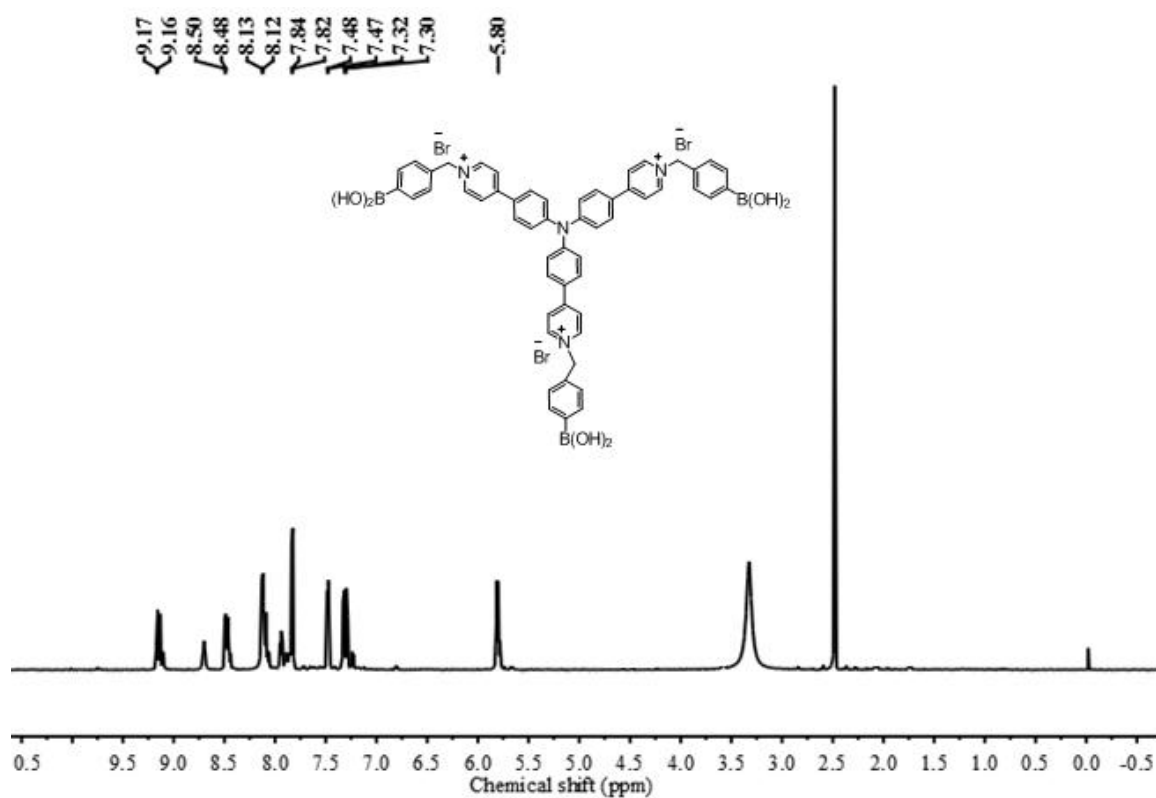

Figure S4 (a)  $^1\text{H}$  NMR spectra of TPA-PPA-3

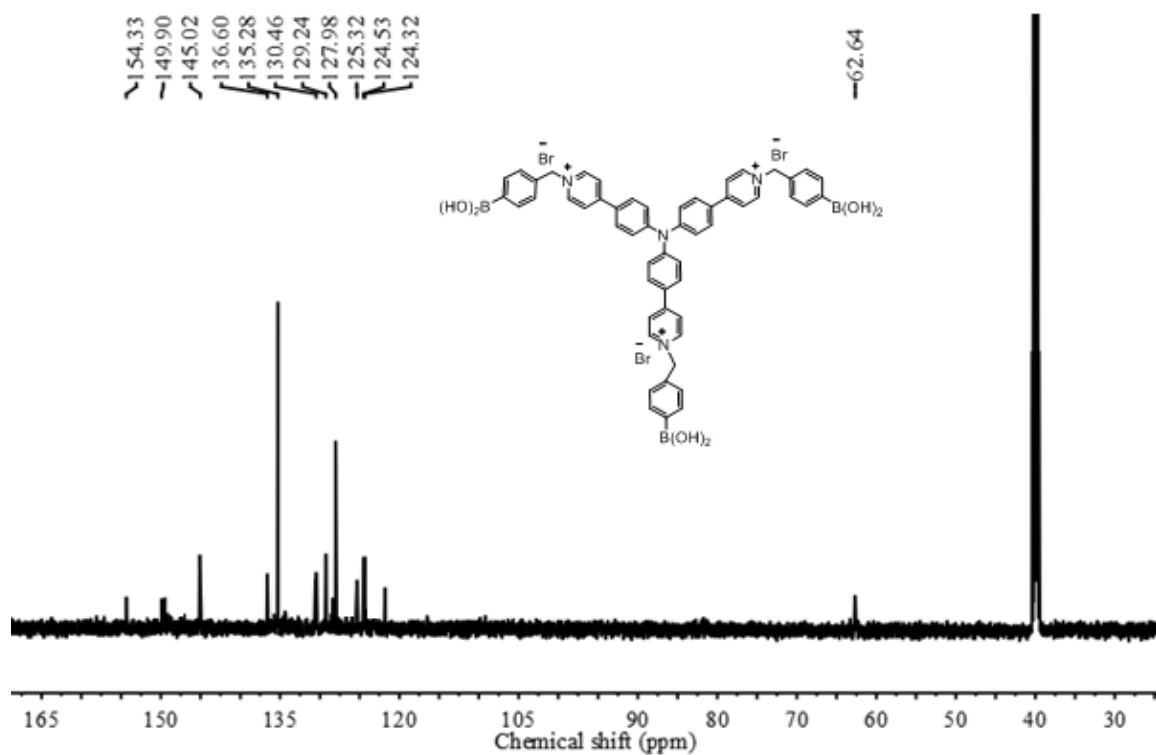

Figure S4 (b)  $^{13}\text{C}$  NMR spectra of TPA-PPA-3



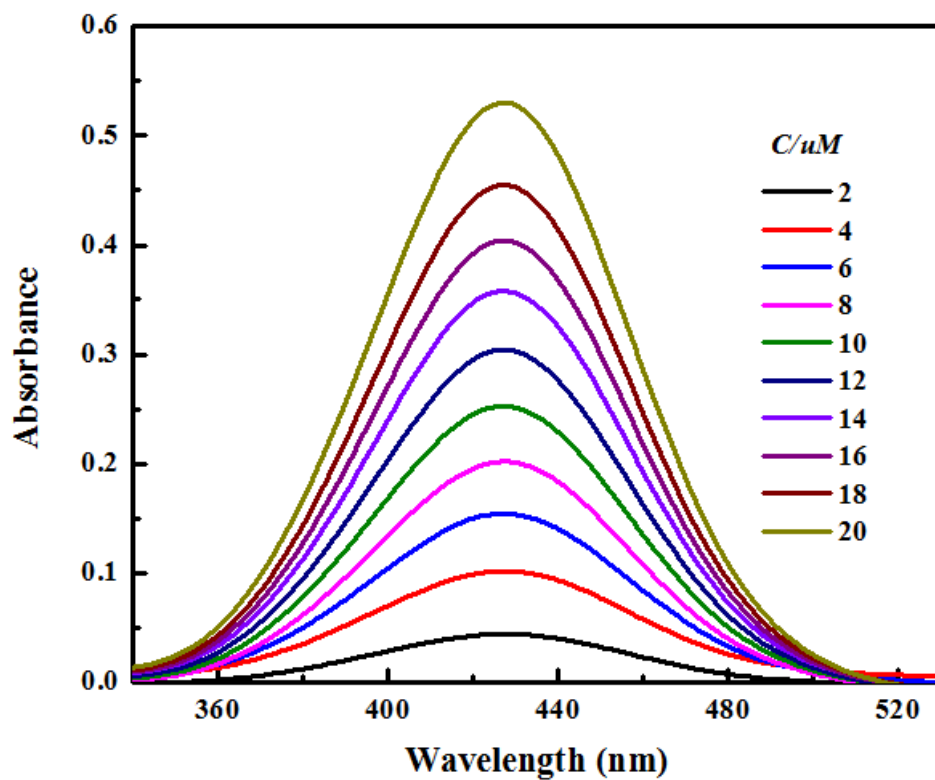

**Figure S5 (a)** Absorption spectra of TPA-PP at a range of 2-20  $\mu\text{M}$  in aqueous solution containing 2 vol % DMSO.

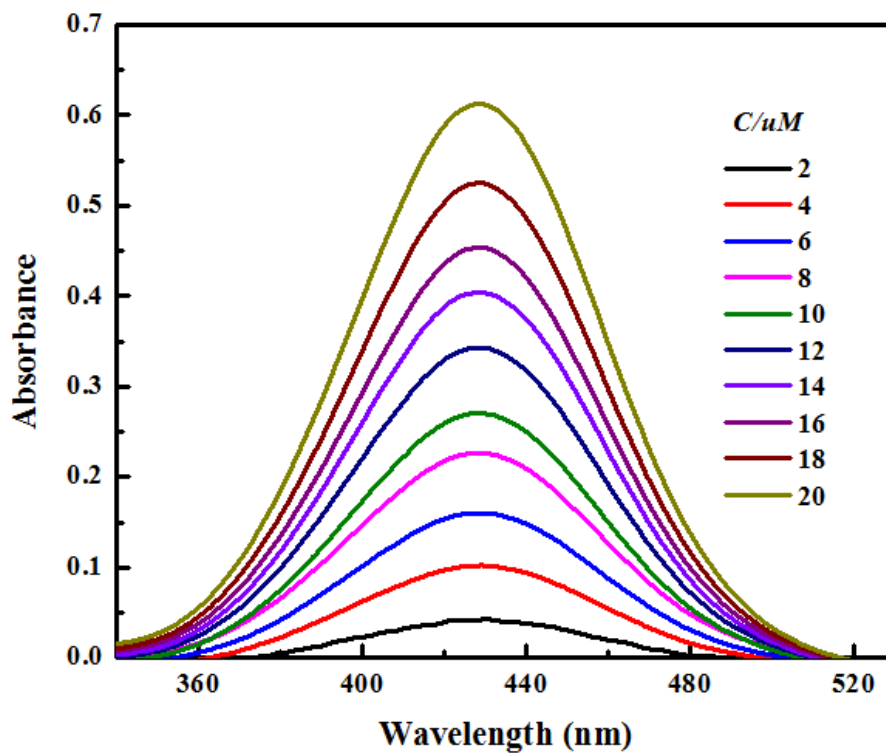

**Figure S5 (b)** Absorption spectra of TPA-PPA-1 at a range of 2-20  $\mu\text{M}$  in aqueous solution containing 2 vol % DMSO.

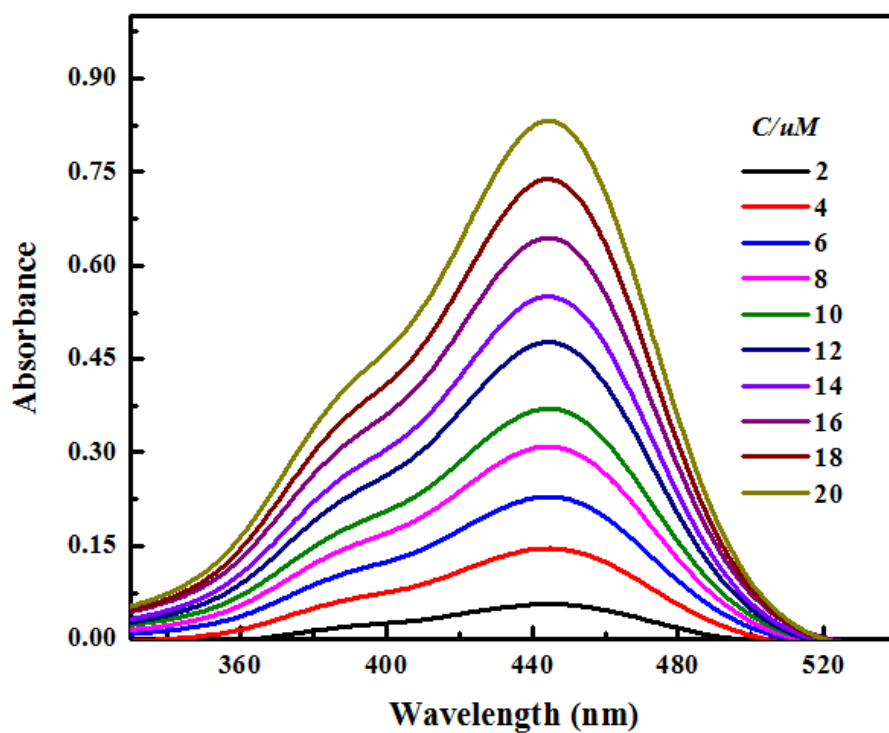

**Figure S5 (c)** Absorption spectra of TPA-PPA-2 at a range of 2-20  $\mu\text{M}$  in aqueous solution containing 2 vol % DMSO.

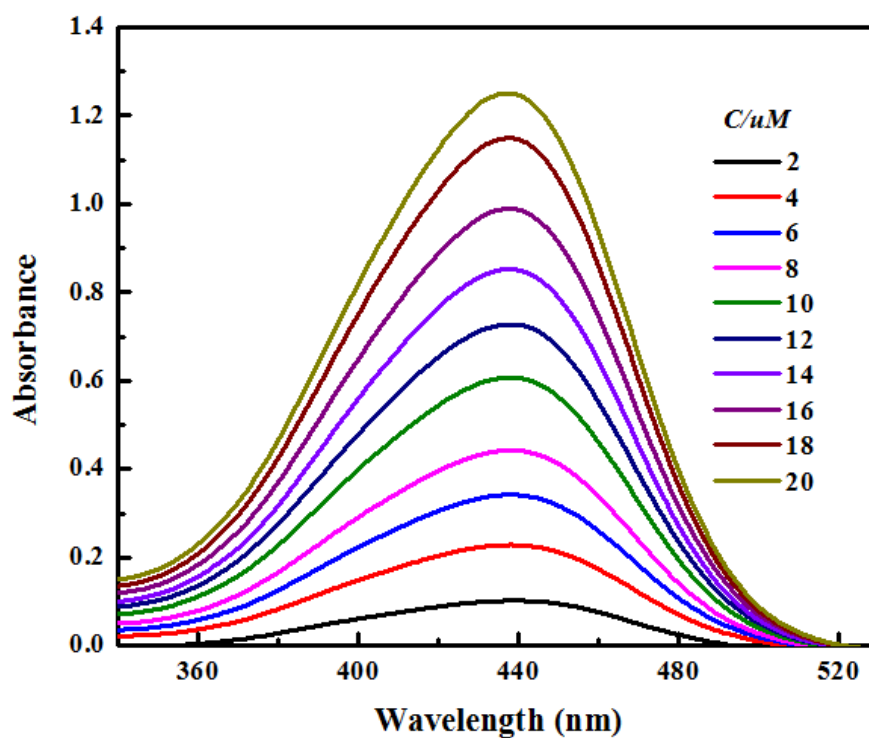

**Figure S5 (d)** Absorption spectra of TPA-PPA-3 at a range of 2-20  $\mu\text{M}$  in aqueous solution containing 2 vol % DMSO.

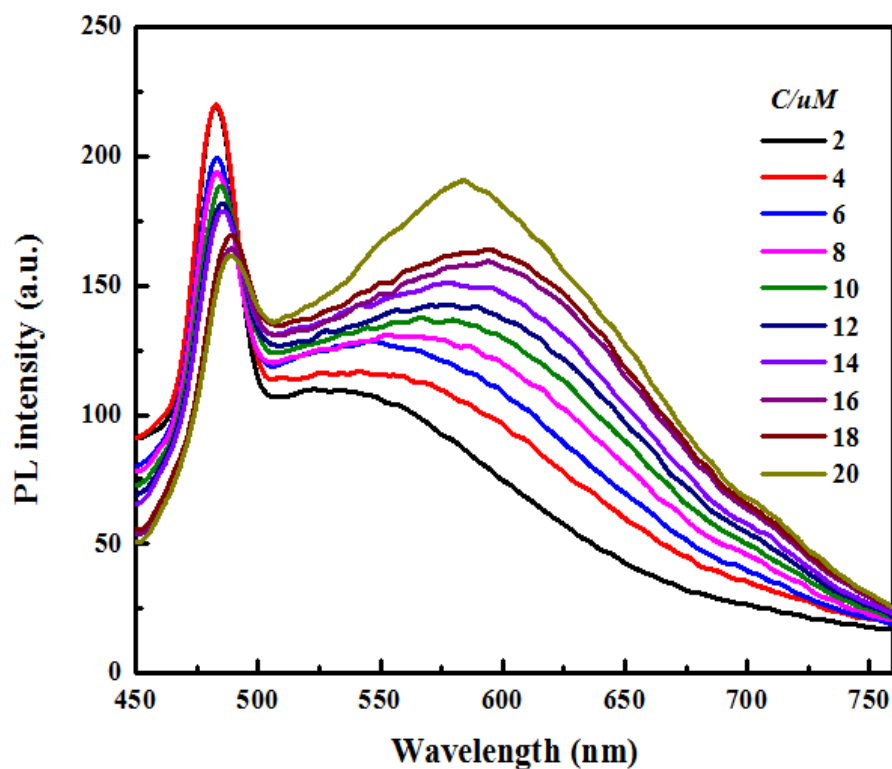

**Figure S6 (a)** Fluorescence spectra of TPA-PP at a range of 2-20  $\mu\text{M}$  in aqueous solution containing 2 vol % DMSO.

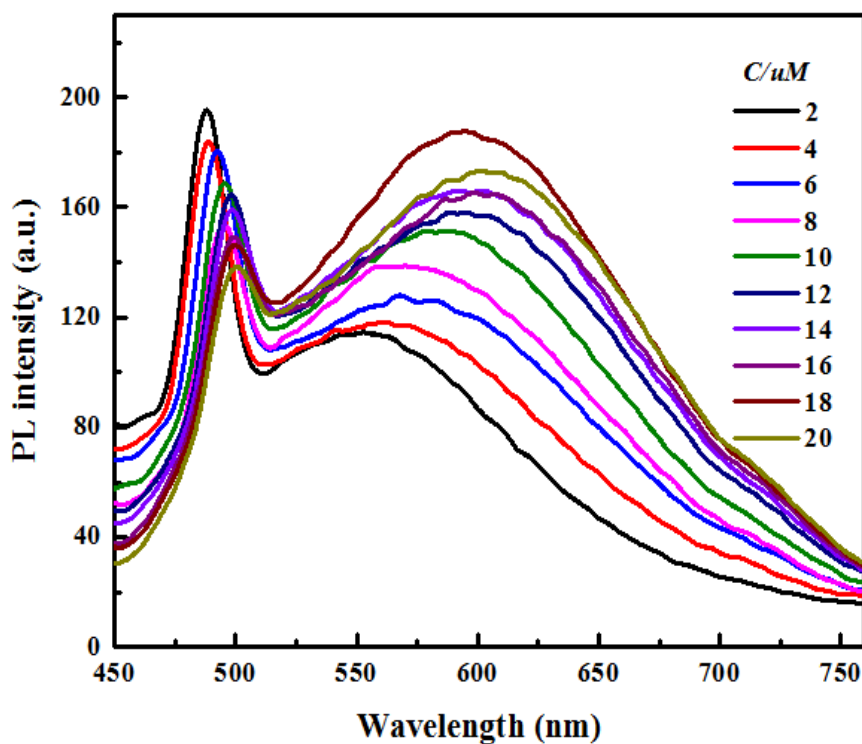

**Figure S6 (b)** Fluorescence spectra of TPA-PPA-1 at a range of 2-20  $\mu\text{M}$  in aqueous solution containing 2 vol % DMSO.

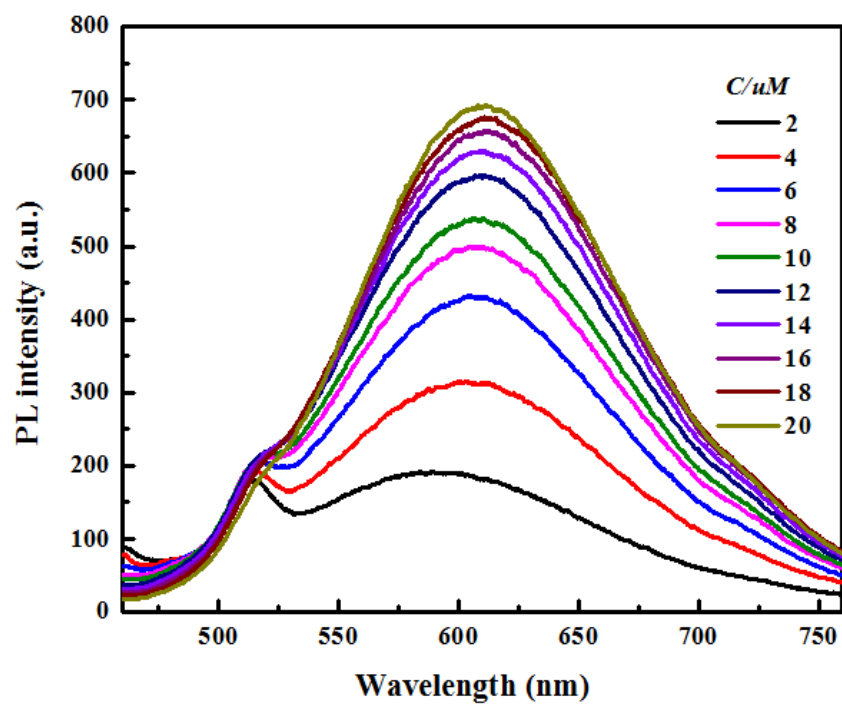

**Figure S6 (c)** Fluorescence spectra of TPA-PPA-2 at a range of 2-20  $\mu\text{M}$  in aqueous solution containing 2 vol % DMSO.

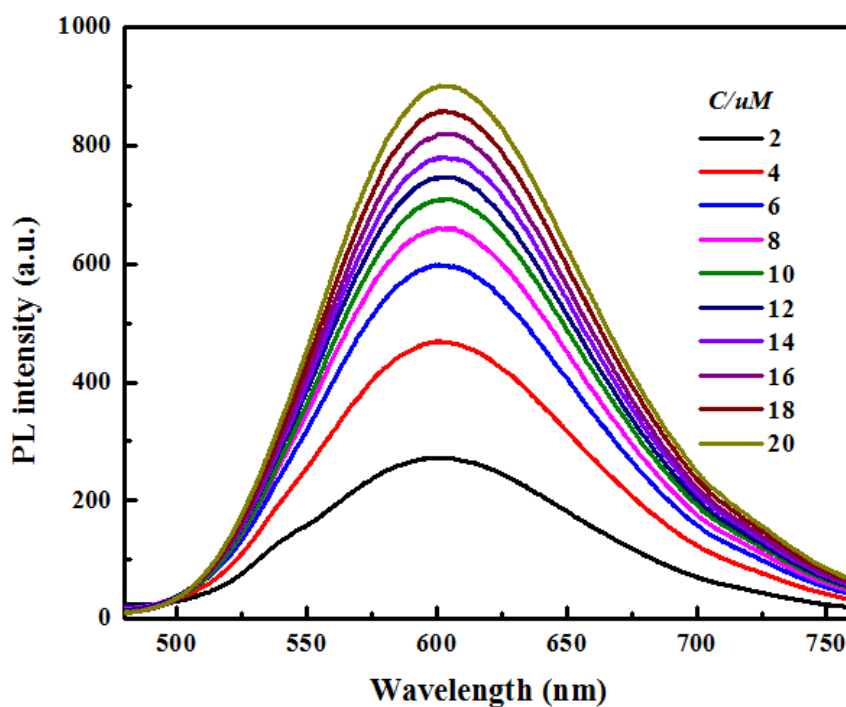

**Figure S6 (d)** Fluorescence spectra of TPA-PPA-3 at a range of 2-20  $\mu\text{M}$  in aqueous solution containing 2 vol % DMSO.

**Table S1** Fluorescence quantum yield of probes without ATP and the addition of ATP

|                              | Without ATP           |                       |              | Addition of ATP       |                       |              |
|------------------------------|-----------------------|-----------------------|--------------|-----------------------|-----------------------|--------------|
|                              | $\lambda_{\text{ex}}$ | $\lambda_{\text{em}}$ | $\Phi^b(\%)$ | $\lambda_{\text{ex}}$ | $\lambda_{\text{em}}$ | $\Phi^c(\%)$ |
| <b>TPA-PP<sup>a</sup></b>    | 427                   | 578                   | 0.13         | 427                   | 589                   | 0.79         |
| <b>TPA-PPA-1<sup>a</sup></b> | 432                   | 591                   | 0.16         | 432                   | 594                   | 1.72         |
| <b>TPA-PPA-2<sup>a</sup></b> | 437                   | 610                   | 0.45         | 437                   | 597                   | 4.36         |
| <b>TPA-PPA-3<sup>a</sup></b> | 451                   | 618                   | 0.89         | 451                   | 601                   | 26.43        |

<sup>a</sup>Conc. of TPA-PP, TPA-PPA-1, TPA-PPA-2 and TPA-PPA-3: 20  $\mu\text{M}$ ; <sup>b</sup>The fluorescence quantum yield without ATP; <sup>c</sup>The fluorescence quantum yield with ATP (ATP conc.: 200  $\mu\text{M}$ .)

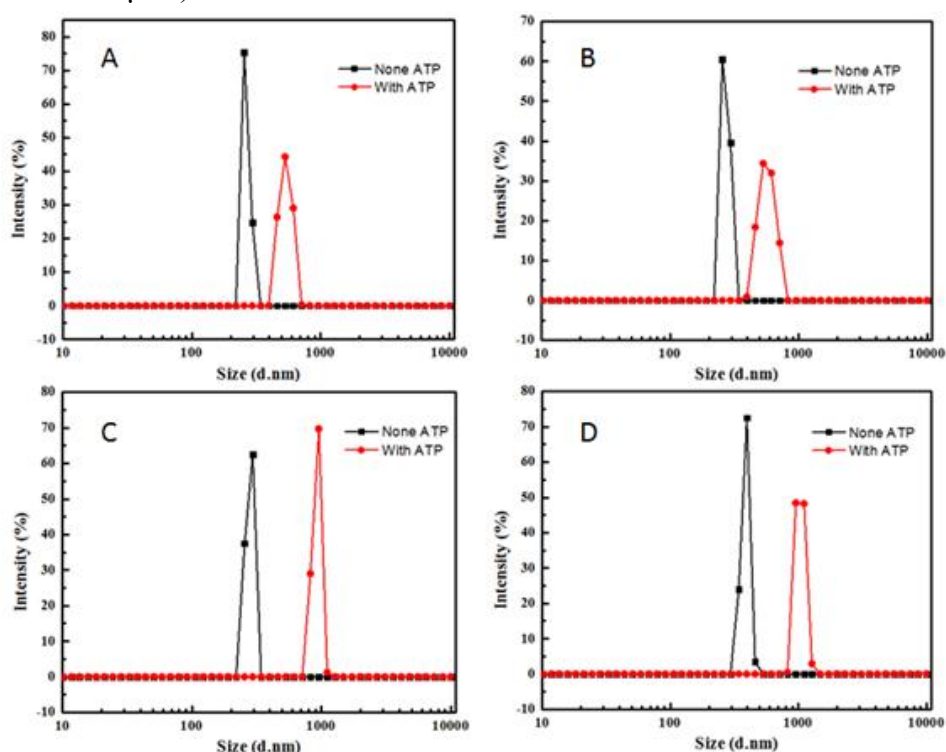

**Figure S7** Particle size distributions of TPA-PP, TPA-PPA-1, TPA-PPA-2, TPA-PPA-3 in aqueous solution containing 2 vol % DMSO and with the addition of ATP.

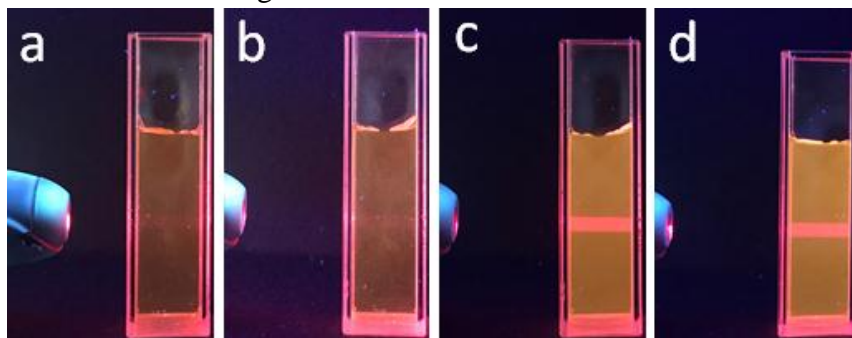

**Figure S8** Tyndall effect of TPA-PPA-3 (a) in aqueous solution containing 2 vol % DMSO and (c) with the addition of ATP, (b), (d) is the corresponding photographs after two weeks.

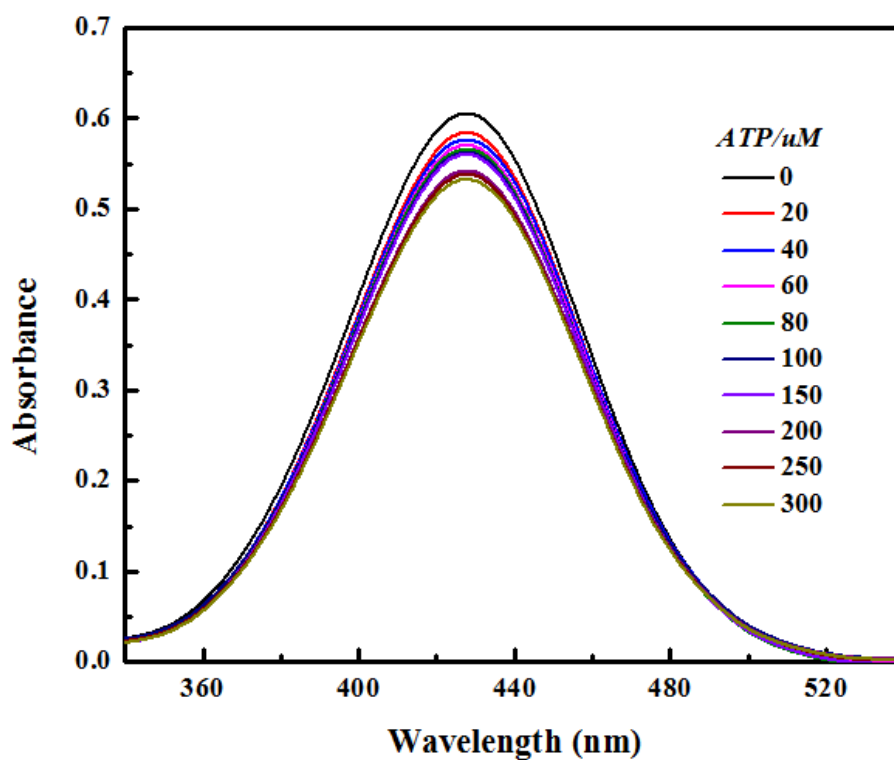

**Figure S9 (a)** Absorption spectra of TPA-PP upon the addition of ATP in aqueous solution containing 2 vol % DMSO. TPA-PP concentration: 20  $\mu\text{M}$ .

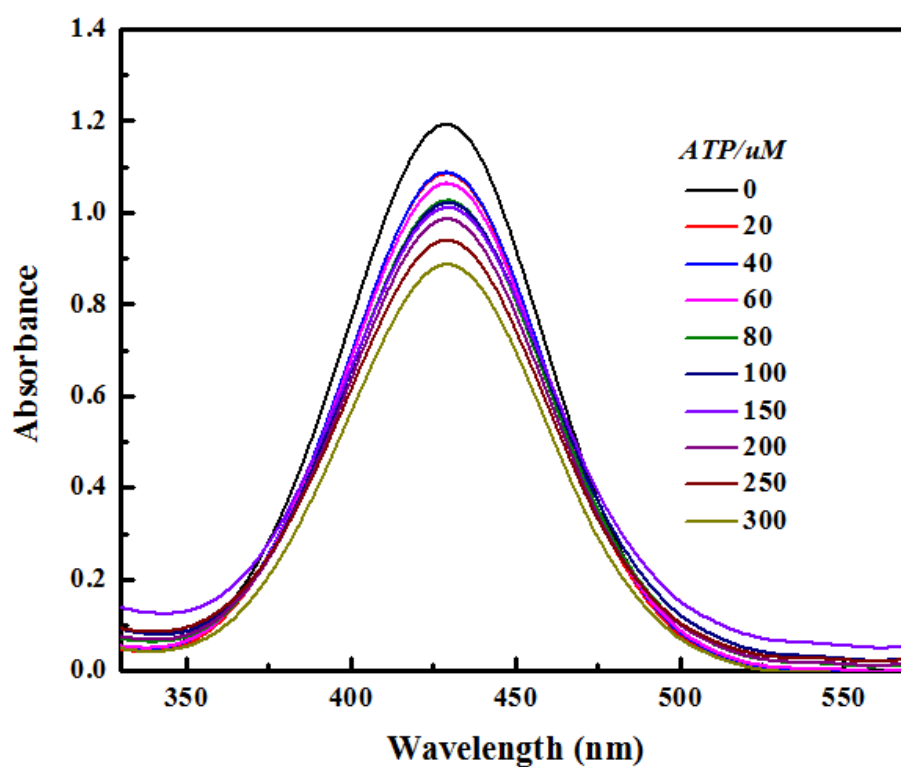

**Figure S9 (b)** Absorption spectra of TPA-PPA-1 upon the addition of ATP in aqueous solution containing 2 vol % DMSO. TPA-PPA-1 concentration: 20  $\mu\text{M}$ .

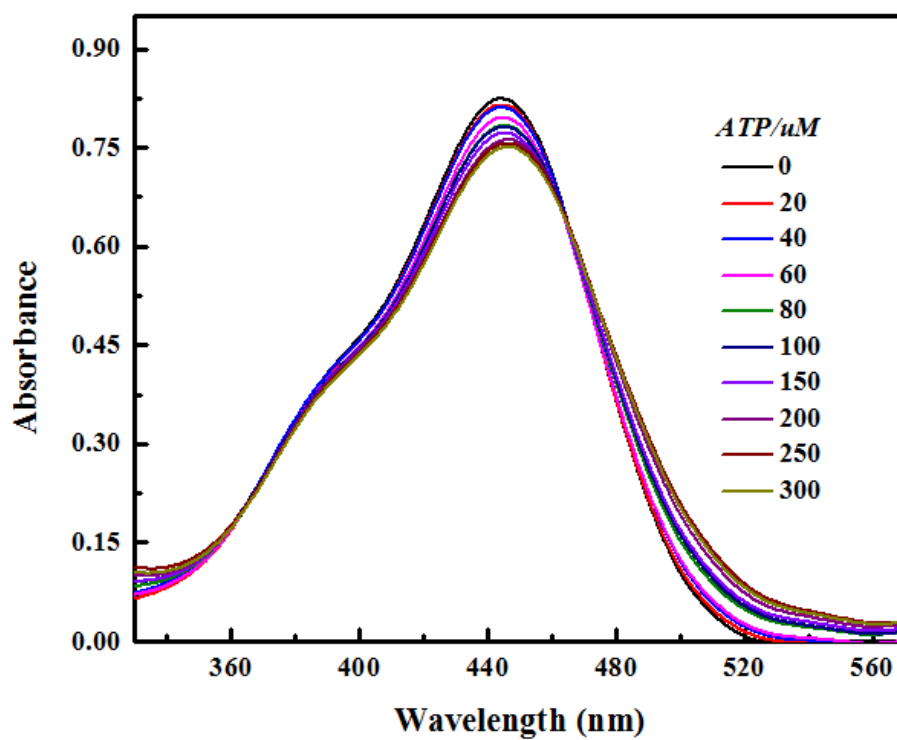

**Figure S9 (c)** Absorption spectra of TPA-PPA-2 upon the addition of ATP in aqueous solution containing 2 vol % DMSO. TPA-PPA-2 concentration: 20  $\mu\text{M}$ .

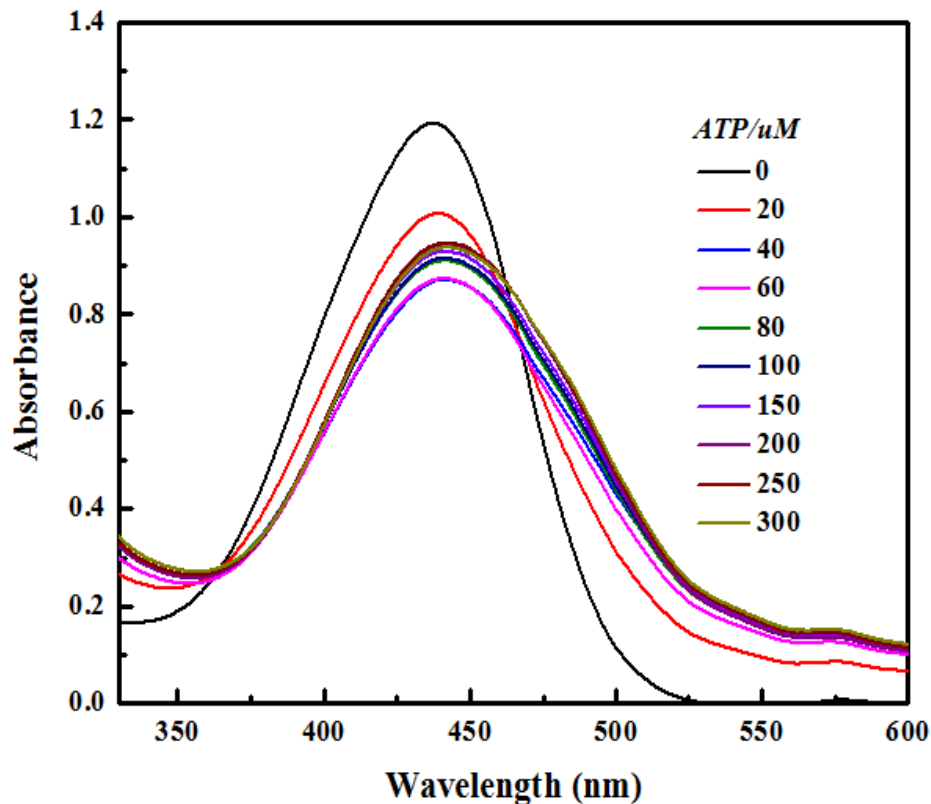

**Figure S9 (d)** Absorption spectra of TPA-PPA-3 upon the addition of ATP in aqueous solution containing 2 vol % DMSO. TPA-PPA-3 concentration: 20  $\mu\text{M}$ .

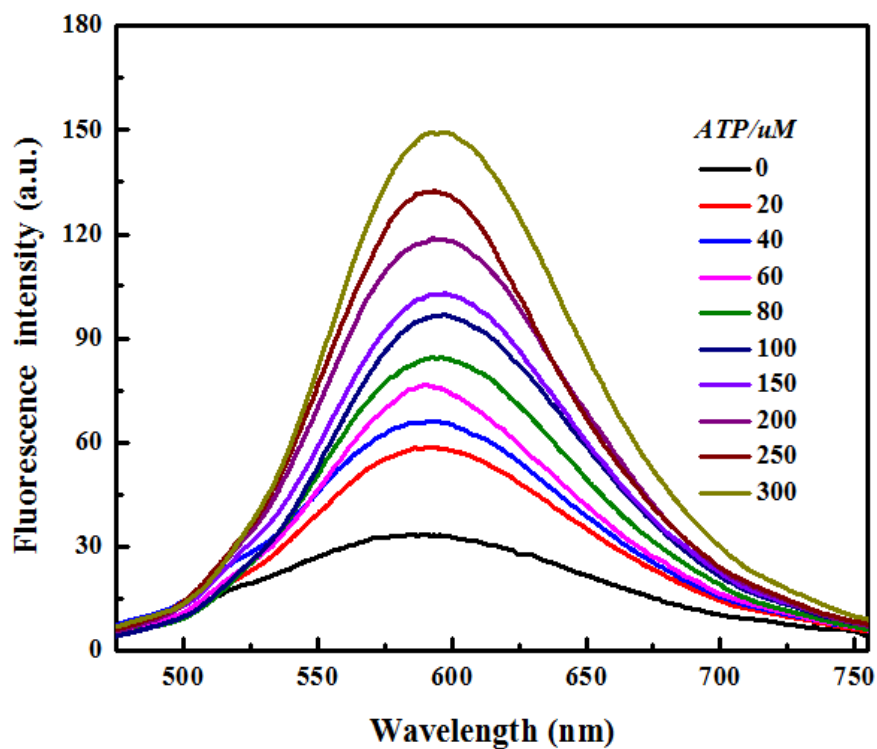

**Figure S10** (a) Fluorescence spectra of TPA-PP upon the addition of ATP in aqueous solution containing 2 vol % DMSO. TPA-PP concentration: 20  $\mu\text{M}$ .

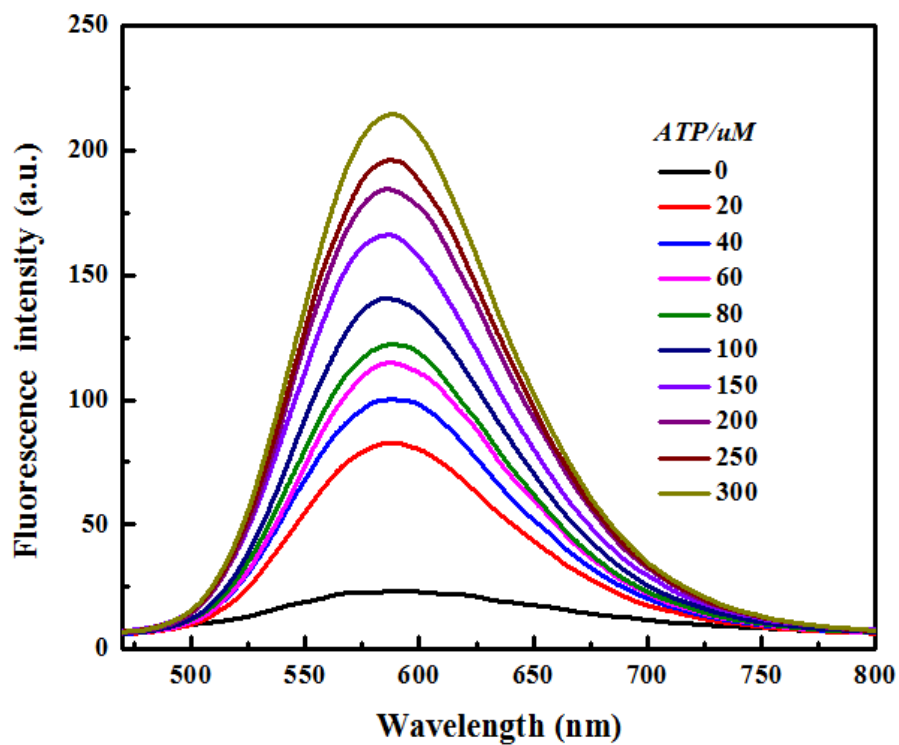

**Figure S10** (b) Fluorescence spectra of TPA-PPA-1 upon the addition of ATP in aqueous solution containing 2 vol % DMSO. TPA-PPA-1 concentration: 20  $\mu\text{M}$ .



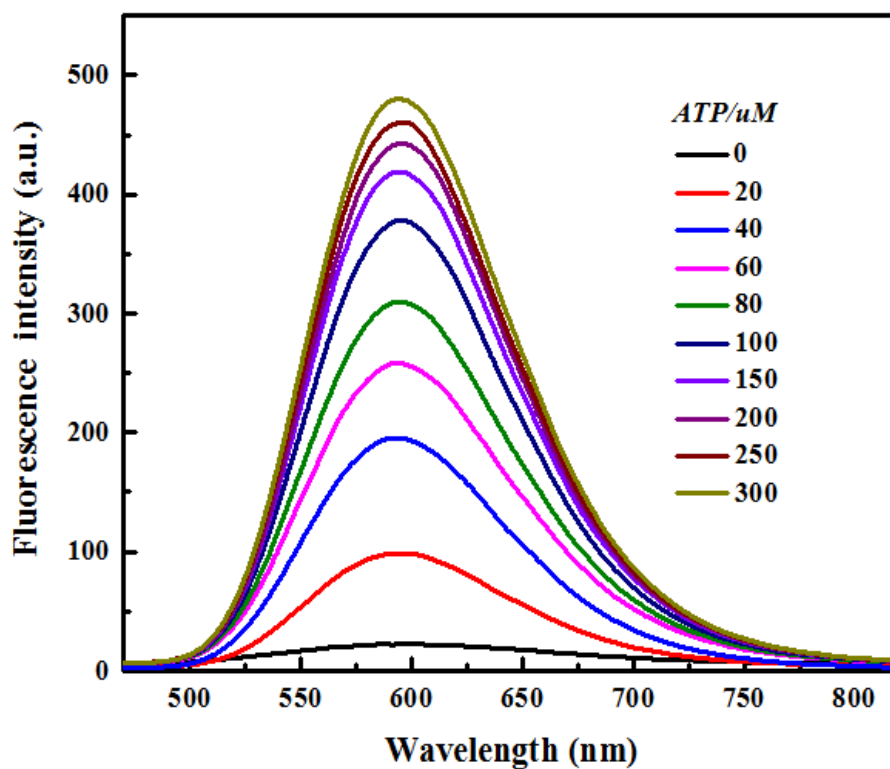

**Figure S10 (c)** Fluorescence spectra of TPA-PPA-2 upon the addition of ATP in aqueous solution containing 2 vol % DMSO. TPA-PPA-2 concentration: 20  $\mu\text{M}$ .

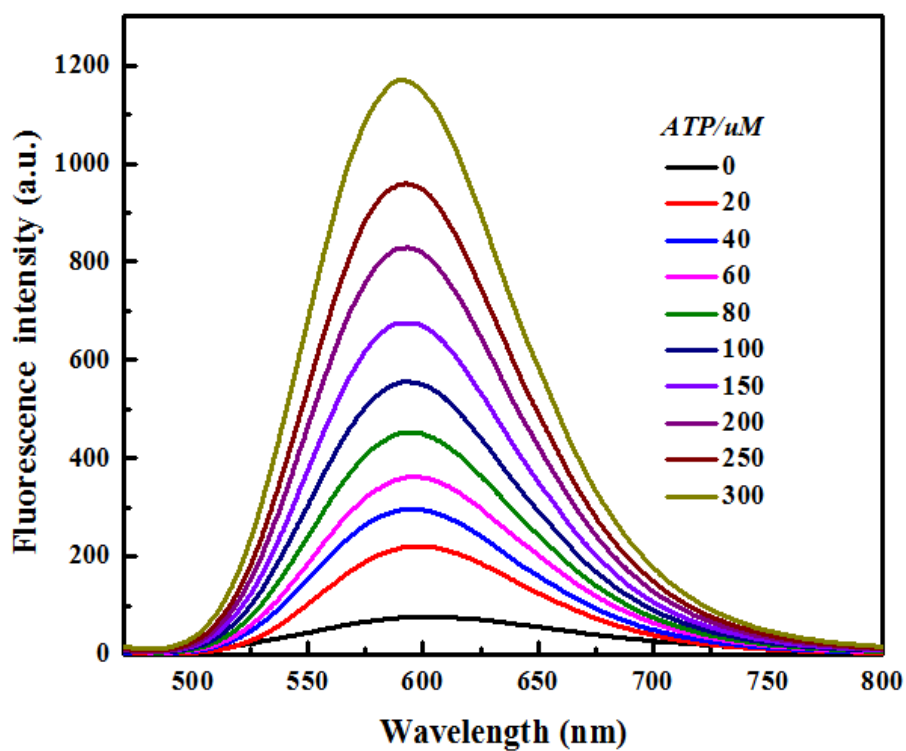

**Figure S10 (d)** Fluorescence spectra of TPA-PPA-3 upon the addition of ATP in aqueous solution containing 2 vol % DMSO. TPA-PPA-3 concentration: 20  $\mu\text{M}$ .

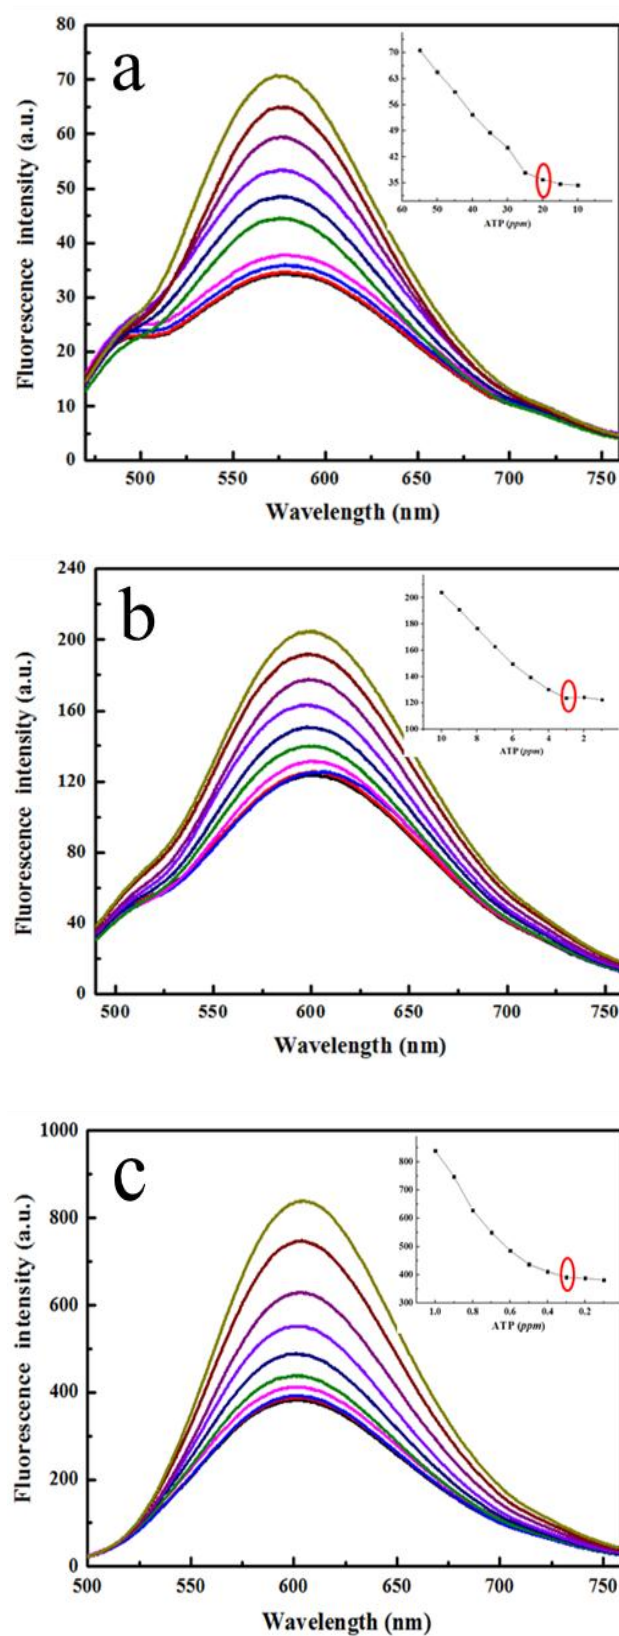

**Figure S11** Fluorescence spectras of (a) TPA-PPA-1( $\lambda_{\text{ex}} = 432$  nm), (b) TPA-PPA-2 ( $\lambda_{\text{ex}} = 437$  nm), (c) TPA-PPA-3( $\lambda_{\text{ex}} = 451$  nm) upon the addition of ATP in dilute solvents.

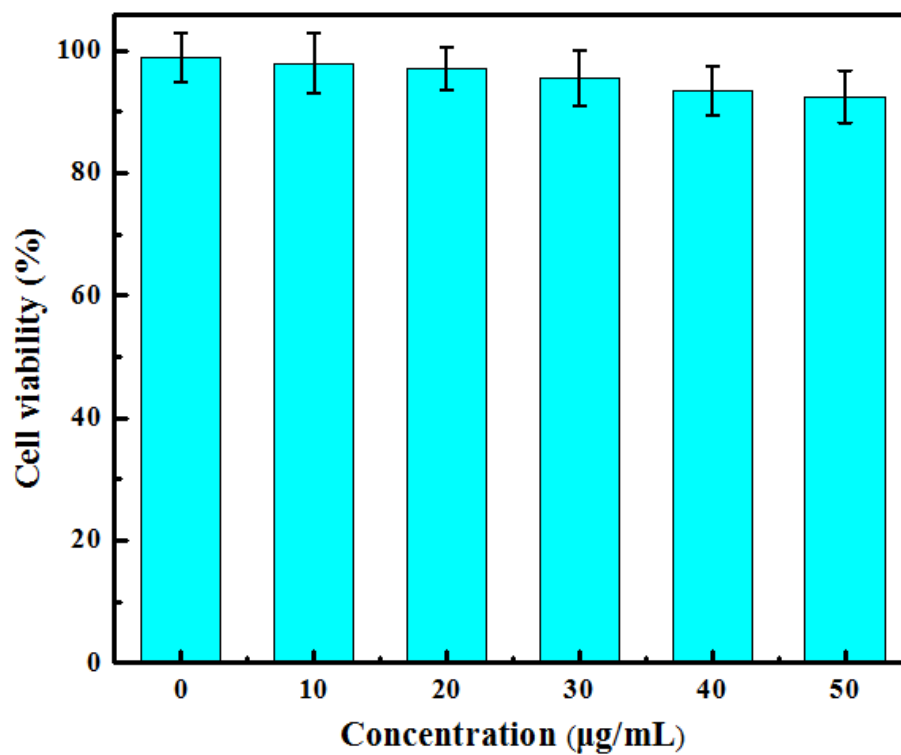

**Figure S12 (a)** Cell viabilities of HepG-2 cells treated with different concentrations of TPA-PP for 96 h by MTT assay

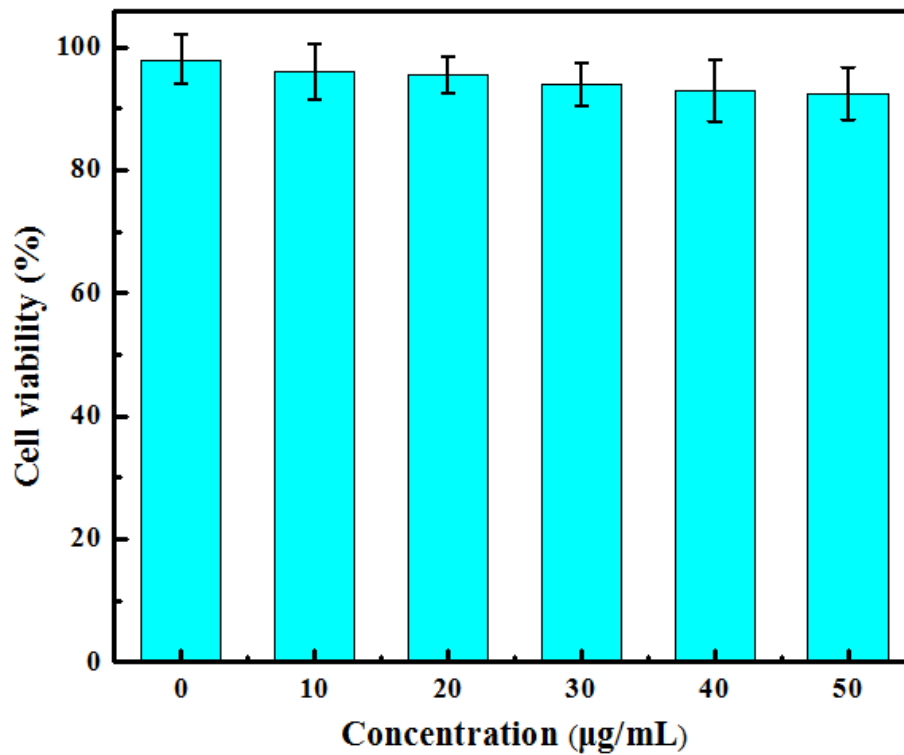

**Figure S12 (b)** Cell viabilities of HepG-2 cells treated with different concentrations of TPA-PPA-1 for 96 h by MTT assay

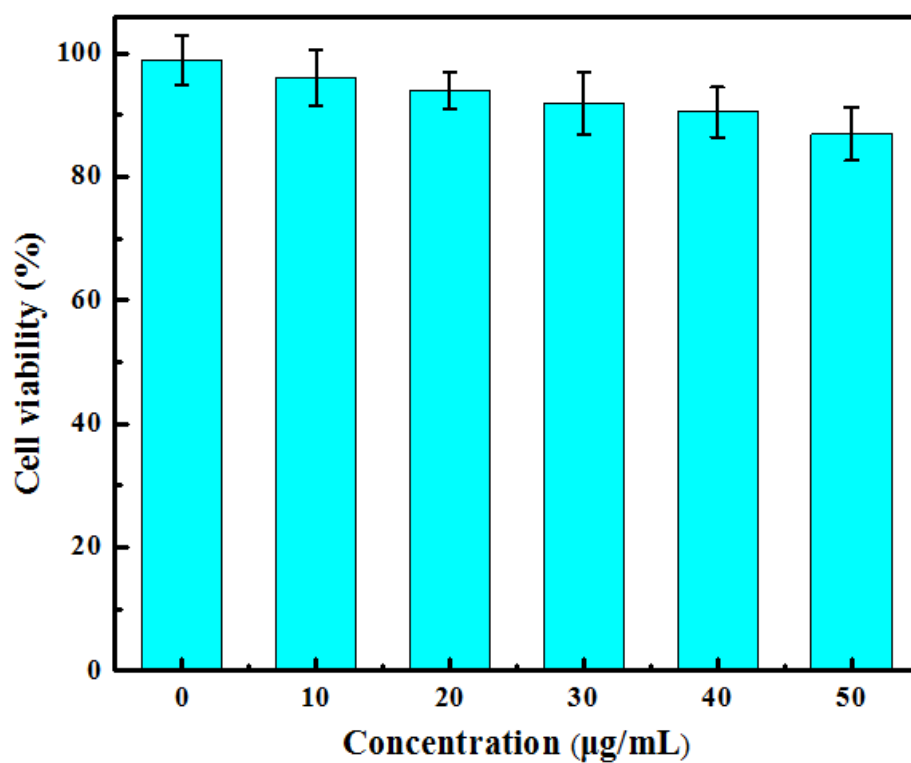

**Figure S12 (c)** Cell viabilities of HepG-2 cells treated with different concentrations of TPA-PPA-2 for 96 h by MTT assay

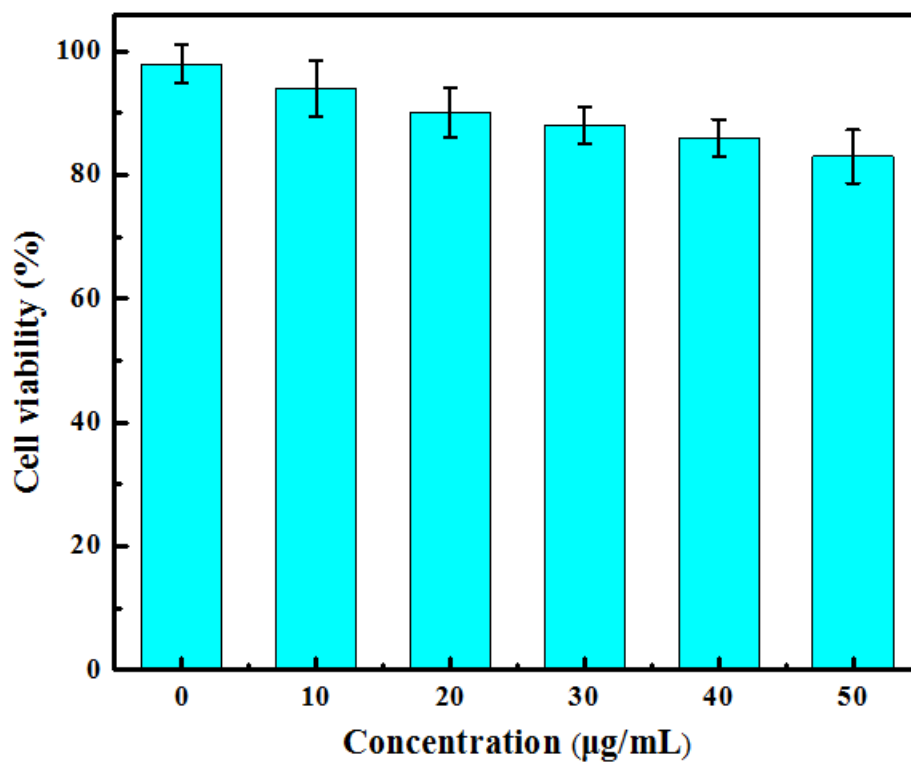

**Figure S12 (d)** Cell viabilities of HepG-2 cells treated with different concentrations of TPA-PPA-3 for 96 h by MTT assay

## Notes and references

- 1 Miyaura, N.; Suzuki, A. Palladium-catalyzed cross-coupling reactions of organoboron compounds. *Chem. Rev.*, **1995**, 95, 2457-2483.
- 2 Xu, Z.; Singh, N. J.; Lim, J.; Pan, J.; Kim, H. N.; Park, S.; Yoon, J. Unique sandwich stacking of pyrene-adenine-pyrene for selective and ratiometric fluorescent sensing of ATP at physiological pH. *J. Am. Chem. Soc.*, **2009**, 131, 15528-15533.
- 3 McIlroy, S. P.; Cló E.; Nikolajsen, L.; Frederiksen, P. K.; Nielsen, C. B.; Mikkelsen, K. V.; Ogilby, P. R. Two-Photon Photosensitized Production of Singlet Oxygen: Sensitizers with Phenylene– Ethynylene-Based Chromophores, *J. Org. Chem.*, **2005**, 70, 1134-1146.
